# Supplementary material
Source: PubMed Central journal article supplement (PMC6867081)
Supplement: HBM-38-4302-s002.pdf [file HBM-38-4302-s002.pdf]

| Participant No | Right Corticomotor FA               |          |        | Left Corticomotor FA                |          |        |
|----------------|-------------------------------------|----------|--------|-------------------------------------|----------|--------|
|                | Data Available & Acceptable Quality | Baseline | Change | Data Available & Acceptable Quality | Baseline | Change |
| 1              | TRUE                                | 0.477456 | -0.24% | TRUE                                | 0.499718 | -3.06% |
| 2              | TRUE                                | 0.510845 | 0.04%  | TRUE                                | 0.477243 | 0.89%  |
| 3              | TRUE                                | 0.506713 | 0.74%  | FALSE                               |          |        |
| 4              | TRUE                                | 0.488153 | 3.45%  | TRUE                                | 0.439912 | 9.37%  |
| 5              | TRUE                                | 0.468355 | -4.83% | TRUE                                | 0.476681 | 7.97%  |
| 6              | TRUE                                | 0.493892 | -0.04% | FALSE                               |          |        |
| 7              | TRUE                                | 0.499521 | -1.30% | TRUE                                | 0.488771 | 1.78%  |
| 8              | TRUE                                | 0.523388 | 4.71%  | TRUE                                | 0.521575 | 1.17%  |
| 9              | TRUE                                | 0.477178 | 6.74%  | TRUE                                | 4.61E-01 | 1.85%  |
| 10             | TRUE                                | 0.538483 | 5.08%  | FALSE                               |          |        |
| 11             | TRUE                                | 0.527411 | 14.74% | TRUE                                | 4.86E-01 | 12.93% |
| 12             | TRUE                                | 0.475994 | -0.90% | FALSE                               |          |        |
| 13             | TRUE                                | 0.517617 | 7.24%  | TRUE                                | 0.502667 | -6.04% |
| 14             | TRUE                                | 0.464321 | 1.83%  | TRUE                                | 0.471007 | 0.99%  |
| 15             | TRUE                                | 0.529736 | 3.87%  | TRUE                                | 4.89E-01 | -7.38% |
| 16             | TRUE                                | 0.468246 | -0.18% | TRUE                                | 5.03E-01 | -8.33% |
| 17             | TRUE                                | 0.572679 | 14.83% | FALSE                               |          |        |
| 18             | TRUE                                | 0.461699 | 0.06%  | TRUE                                | 0.475482 | 4.01%  |
| 19             | TRUE                                | 0.546515 | 3.85%  | TRUE                                | 0.470475 | -1.68% |
| 20             | TRUE                                | 0.443202 | -0.03% | TRUE                                | 0.478225 | -1.36% |
| 21             | TRUE                                | 0.472385 | 2.19%  | TRUE                                | 0.453867 | -0.96% |
| 22             | TRUE                                | 0.515356 | 10.37% | TRUE                                | 0.509129 | -0.76% |
| 23             | FALSE                               |          |        | FALSE                               |          |        |
|                |                                     | Mean     | 3.28%  |                                     | Mean     | 0.67%  |
|                |                                     | SEM      | 1.07%  |                                     | SEM      | 1.37%  |

Notes

All FA and MD values reported here are calculated with MRTrix3

Change refers to % change after treatment, where a positive number implies an increase and negative implies a decrease

| Right Caudate                       |             |            |           |           | Right Nacc                          |             |
|-------------------------------------|-------------|------------|-----------|-----------|-------------------------------------|-------------|
| Data Available & Acceptable Quality | FA Baseline | MD Baselin | FA Change | MD Change | Data Available & Acceptable Quality | FA Baseline |
| TRUE                                | 0.181517289 | 0.000674   | -0.44%    | -1.82%    | TRUE                                | 0.157101213 |
| TRUE                                | 0.174810979 | 0.000674   | 1.10%     | -1.14%    | TRUE                                | 0.150805235 |
| TRUE                                | 0.189847414 | 0.000667   | -1.89%    | 3.83%     | TRUE                                | 0.131470122 |
| TRUE                                | 0.180169746 | 0.00069    | 8.04%     | -3.12%    | TRUE                                | 0.158205422 |
| TRUE                                | 0.173878666 | 0.000705   | 2.29%     | -0.54%    | TRUE                                | 0.166136037 |
| TRUE                                | 0.163410165 | 0.000676   | -5.45%    | 2.60%     | TRUE                                | 0.160472419 |
| TRUE                                | 0.159197516 | 0.000681   | 1.91%     | 2.10%     | TRUE                                | 0.156255176 |
| TRUE                                | 0.151793757 | 0.000678   | 7.18%     | 0.23%     | TRUE                                | 0.120894607 |
| TRUE                                | 0.21598334  | 0.000601   | -2.70%    | 4.19%     | TRUE                                | 0.215366658 |
| TRUE                                | 0.163714231 | 0.00067    | -1.51%    | 1.33%     | TRUE                                | 0.134822014 |
| TRUE                                | 0.185323144 | 0.000654   | 3.34%     | 3.94%     | TRUE                                | 0.15919296  |
| TRUE                                | 0.161394234 | 0.00069    | 6.14%     | -3.15%    | TRUE                                | 0.154899354 |
| TRUE                                | 0.176872249 | 0.000647   | 6.54%     | -0.12%    | TRUE                                | 0.216632928 |
| TRUE                                | 0.171326534 | 0.000653   | 5.78%     | 0.96%     | TRUE                                | 0.148367566 |
| TRUE                                | 0.173741791 | 0.000715   | 9.31%     | -4.14%    | TRUE                                | 0.149506112 |
| TRUE                                | 0.168157448 | 0.000725   | 13.34%    | -3.40%    | TRUE                                | 0.151074118 |
| TRUE                                | 0.168565545 | 0.00068    | -2.61%    | -0.77%    | TRUE                                | 0.155623084 |
| TRUE                                | 0.138151033 | 0.000717   | 21.13%    | -4.86%    | TRUE                                | 0.150616345 |
| TRUE                                | 0.14744823  | 0.000694   | 18.58%    | -2.89%    | TRUE                                | 0.17245385  |
| TRUE                                | 0.154690387 | 0.000717   | 8.16%     | -4.79%    | TRUE                                | 0.210554032 |
| TRUE                                | 0.167775463 | 0.000699   | 7.21%     | -6.46%    | TRUE                                | 0.180016031 |
| TRUE                                | 0.181806027 | 0.000667   | 3.32%     | -0.29%    | TRUE                                | 0.137578062 |
| FALSE                               |             |            |           |           | FALSE                               |             |
|                                     |             | Mean       | 4.94%     | -0.83%    |                                     |             |
|                                     |             | SEM        | 1.43%     | 0.65%     |                                     |             |

| MD Baseline | FA Change | MD Change | Left_MFG_middle_frontal_gyrus-->Left_Caudate |                |       | Right Middle Frontal Gyrus Connection To Right |                |
|-------------|-----------|-----------|----------------------------------------------|----------------|-------|------------------------------------------------|----------------|
|             |           |           | FA Baseline                                  | FA Change      | FA+   | FA Baseline                                    | FA Change      |
| 0.00065084  | 3.33%     | -1.63%    | 0.3385321                                    | 0.63%          | TRUE  | 0.3504318                                      | -2.31%         |
| 0.000667942 | -8.28%    | 1.39%     | 0.3299382                                    | -0.51%         | FALSE | 0.3242379                                      | 2.76%          |
| 0.000664474 | 1.87%     | -0.84%    | 0.340514                                     | -1.76%         | FALSE | 0.351215                                       | -2.27%         |
| 0.0006532   | -3.95%    | -2.91%    | 0.3058418                                    | -2.14%         | FALSE | 0.2984361                                      | 1.56%          |
| 0.000667331 | 0.13%     | -2.92%    | 0.3158441                                    | -2.05%         | FALSE | 0.3039525                                      | 2.05%          |
| 0.000652078 | -9.72%    | 0.13%     | 0.3293103                                    | -2.80%         | FALSE | 0.3283286                                      | 1.17%          |
| 0.000684085 | 2.32%     | -2.11%    | 0.3390181                                    | -0.48%         | FALSE | 0.3344566                                      | -7.48%         |
| 0.000682303 | 8.34%     | -2.51%    | 0.3500984                                    | 5.58%          | TRUE  | 0.3406523                                      | 5.27%          |
| 0.000634419 | -22.05%   | 4.50%     | 0.3632995                                    | -3.04%         | FALSE | 0.3571173                                      | 3.22%          |
| 0.000685061 | -1.49%    | 1.90%     | 0.311541                                     | 3.29%          | TRUE  | 0.319716                                       | -4.27%         |
| 0.000656304 | 6.81%     | 1.68%     | 0.3514846                                    | 4.50%          | TRUE  | 0.3495653                                      | 3.11%          |
| 0.00070668  | -10.08%   | -2.65%    | 0.3253631                                    | -3.90%         | FALSE | 0.3161911                                      | 2.65%          |
| 0.000587942 | -3.35%    | 5.31%     | 0.3453799                                    | -2.47%         | FALSE | 0.3302987                                      | 3.92%          |
| 0.000645415 | -9.66%    | -0.76%    | 0.3538143                                    | -2.21%         | FALSE | 0.3480254                                      | 1.10%          |
| 0.000689932 | 14.92%    | -3.55%    | 0.3644329                                    | 1.50%          | TRUE  | 0.3545421                                      | 1.51%          |
| 0.000688739 | -8.81%    | 3.19%     | 0.3064333                                    | 3.03%          | TRUE  | 0.3093586                                      | 3.27%          |
| 0.000654873 | 1.02%     | 1.01%     | 0.3398275                                    | -1.57%         | FALSE | 0.3446307                                      | 2.00%          |
| 0.000668018 | -1.58%    | 2.69%     | 0.328349                                     | 1.29%          | TRUE  | 0.3237216                                      | 1.24%          |
| 0.000677411 | -8.68%    | -2.07%    | 0.2899864                                    | 2.78%          | TRUE  | 0.3074107                                      | 7.23%          |
| 0.000640865 | -15.70%   | -1.13%    | 0.3188151                                    | 4.73%          | TRUE  | 0.3177553                                      | 5.27%          |
| 0.000642623 | 2.39%     | -4.30%    | 0.3510711                                    | -4.17%         | FALSE | 0.3462374                                      | -0.70%         |
| 0.000643401 | -7.53%    | 2.42%     | 0.3408137                                    | 0.84%          | TRUE  | 0.3337379                                      | 0.47%          |
| Mean        | -3.17%    | -0.14%    |                                              | Count positive | 10    |                                                | Count positive |
| SEM         | 1.79%     | 0.58%     |                                              |                |       |                                                |                |

| Caudate |             | Left_SMC_supplementary_motor_cortex-->Left_MFG_middle_frontal_gyrus |       |  |
|---------|-------------|---------------------------------------------------------------------|-------|--|
| FA+     | FA Baseline | FA Change                                                           | FA+   |  |
| FALSE   | 0.4180332   | 5.09%                                                               | TRUE  |  |
| TRUE    | 0.4263764   | 1.75%                                                               | TRUE  |  |
| FALSE   | 0.4522245   | -4.48%                                                              | FALSE |  |
| TRUE    | 0.387824    | 0.38%                                                               | TRUE  |  |
| TRUE    | 0.3931099   | -2.74%                                                              | FALSE |  |
| TRUE    | 0.406826    | 0.53%                                                               | TRUE  |  |
| FALSE   | 0.4266399   | 3.82%                                                               | TRUE  |  |
| TRUE    | 0.405425    | 3.86%                                                               | TRUE  |  |
| TRUE    | 0.4248275   | -0.70%                                                              | FALSE |  |
| FALSE   | 0.4121705   | -1.15%                                                              | FALSE |  |
| TRUE    | 0.4353699   | 4.60%                                                               | TRUE  |  |
| TRUE    | 0.3952772   | 0.35%                                                               | TRUE  |  |
| TRUE    | 0.4206727   | -12.15%                                                             | FALSE |  |
| TRUE    | 0.4365656   | -0.66%                                                              | FALSE |  |
| TRUE    | 0.4510375   | 1.94%                                                               | TRUE  |  |
| TRUE    | 0.444867    | -2.82%                                                              | FALSE |  |
| TRUE    | 0.4046623   | 2.38%                                                               | TRUE  |  |
| TRUE    | 0.4354466   | -0.45%                                                              | FALSE |  |
| TRUE    | 0.3769921   | 3.79%                                                               | TRUE  |  |
| TRUE    | 0.4020572   | 5.63%                                                               | TRUE  |  |
| FALSE   | 0.4083018   | -3.99%                                                              | FALSE |  |
| TRUE    | 0.417526    | 0.30%                                                               | TRUE  |  |

DATA NOT NORMAL

Right\_SMC\_supplementary\_motor\_cortex-->Right\_MFG\_middle\_frontal\_gyrus

| FA Baseline | FA Change | FA+   |  |
|-------------|-----------|-------|--|
| 0.4096439   | 0.97%     | TRUE  |  |
| 0.4146282   | 1.71%     | TRUE  |  |
| 0.4565066   | -2.31%    | FALSE |  |
| 0.3755804   | 3.47%     | TRUE  |  |
| 0.4074879   | 1.45%     | TRUE  |  |
| 0.4046958   | 1.72%     | TRUE  |  |
| 0.4285593   | -1.89%    | FALSE |  |
| 0.413769    | 6.04%     | TRUE  |  |
| 0.4031989   | 3.24%     | TRUE  |  |
| 0.3998291   | 6.91%     | TRUE  |  |
| 0.4401036   | 5.15%     | TRUE  |  |
| 0.4032826   | 0.75%     | TRUE  |  |
| 0.4185883   | -12.21%   | FALSE |  |
| 0.4203827   | 1.22%     | TRUE  |  |
| 0.4412325   | -0.60%    | FALSE |  |
| 0.4064932   | 3.34%     | TRUE  |  |
| 0.3970453   | 1.37%     | TRUE  |  |
| 0.4307228   | 2.37%     | TRUE  |  |
| 0.3755089   | 9.66%     | TRUE  |  |
| 0.4079837   | 4.52%     | TRUE  |  |
| 0.3941869   | 3.54%     | TRUE  |  |
| 0.4124353   | 1.03%     | TRUE  |  |

DATA NOT NORMAL

Count positive

18
